# Supplementary material for: Integration of In Situ and Remote Sensing Measurements for the Management of Harmful Cyanobacteria Blooms. A Lesson from a Strategic Multiple-Uses Reservoir (Lake Occhito, South Italy)
Source: MDPI journal article supplement (doi:10.3390/w13162162), 2021-08-06
Supplement: s1 [file s1]

Archive with 1 entries (1 files):
- water-1287780-supplementary.pdf
