# Supplementary material for: Integration of In Situ and Remote Sensing Measurements for the Management of Harmful Cyanobacteria Blooms. A Lesson from a Strategic Multiple-Uses Reservoir (Lake Occhito, South Italy)
Source: MDPI journal article supplement (doi:10.3390/w13162162), 2021-08-06
Supplement: s1 [file s1 › water-1287780-supplementary.pdf]

## Supplementary Material

**Table S1.** Morphometric features of the irrigation network fed by the Lake Occhito waters. Area: surface area (m<sup>2</sup>), Depth: mean depth (m), Volume (m<sup>3</sup>), Distance: distance from the lake (km), Time: average travelling time of the water from the lake to the tank (h), Velocity: average water velocity from the lake to the tank (km h<sup>-1</sup>).

| Tank       | Area  | Depth | Volume | Distance | Time | Velocity |
|------------|-------|-------|--------|----------|------|----------|
| Finocchito | 3000  | 10.0  | 30000  | 16       | 2    | 8        |
| Tavoliere  | 8000  | 8.0   | 24000  | 30       | 4    | 8        |
| Tank D     | 13000 | 17.7  | 53000  | 38       | 6    | 6        |
| Tank 3     | 24000 | 31.7  | 95000  | 37       | 4    | 9        |
| Tank P1    | 100   | 0.3   | 1000   | 47       | 5    | 9        |
| Tank 5     | 6500  | 0.6   | 1700   | 51       | 6    | 9        |

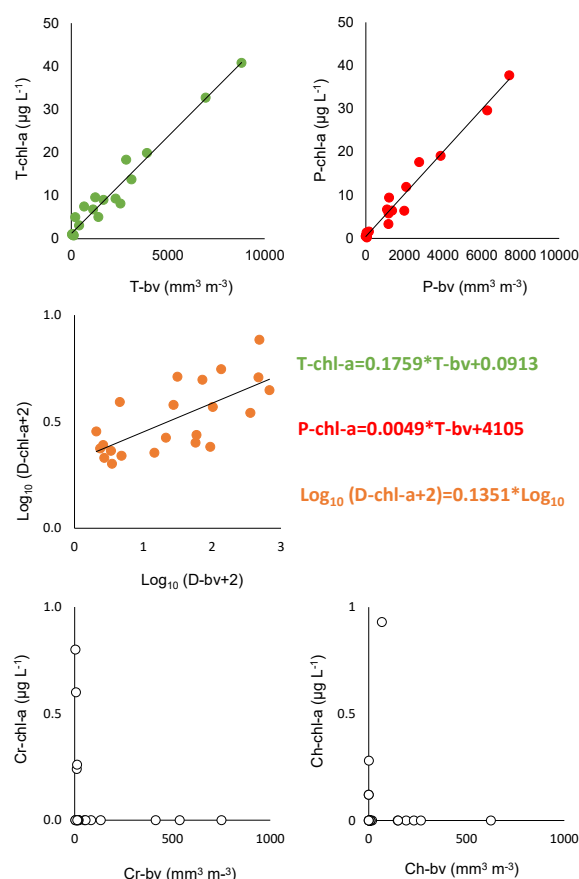

**Figure S1.** Relationships between biovolume and chlorophyll-a related to the total phytoplankton assemblage (upper left panel) and that related to specific FluoroProbe spectral classes: *P. rubescens* (upper right panel), diatoms (central panel), Cryptophyta (left lower panel), and Chlorophyta (right lower panel), measure between April 2009 and April 2010. See the manuscript text for explanation. Among the samples collected in the four field campaigns in the period April 2009–April 2010 a significant linear relationship was found between total biovolume (T-bv) and T-chl-a ( $r = 0.98$ ;  $N = 22$ ;  $p$ -value  $< 0.001$ ; T-bv range = 32–8978 mm<sup>3</sup> m<sup>-3</sup>) between the biovolume (P-bv) and the chlorophyll-a concentration of *P. rubescens* ( $r = 0.99$ ;  $N = 22$ ;  $p$ -value  $< 0.001$ ; P-bv range = 3–7416 mm<sup>3</sup> m<sup>-3</sup>) and between the biovolume (D-bv) and the chlorophyll-a concentration of Diatoms ( $r = 0.69$ ,  $N = 22$ ,  $p$ -value  $< 0.001$ ; D-bv range = 0.1–680 mm<sup>3</sup> m<sup>-3</sup>). Both D-chl-a and D-bv values were log transformed to meet the condition of normality distribution of the residuals (see section 2.4). No significant relationships were found for the other two classes, probably because of their very low contribution to the total biovolume (Fig. S1).

**Table S2.** List of species detected in Lake Occhito in the four field campaigns carried out between April 2009 and April 2010. In bold species that contributed significantly (>5% in a sample) to the phytoplankton population.

| Species                                 | Systematic group  |
|-----------------------------------------|-------------------|
| <i>Aphanizomenon flos-aquae</i>         | cyanobacteria     |
| <b><i>Ceratium hirundinella</i></b>     | dinophyceae       |
| <i>Chrysocromulina parva</i>            | chrysophyceae     |
| <b><i>Closterium aciculare</i></b>      | coniugate         |
| <b><i>Closterium acutum</i></b>         | coniugate         |
| <i>Closterium acutum var. variabile</i> | coniugate         |
| <b><i>Cosmarium</i> sp.</b>             | chlorophyceae     |
| <i>Cryptomonas erosa</i>                | cryptophyceae     |
| <i>Cryptomonas marsonii</i>             | cryptophyceae     |
| <i>Cryptomonas ovata</i>                | cryptophyceae     |
| <b><i>Cryptomonas</i> sp.</b>           | cryptophyceae     |
| <b><i>Cyclotella ocellata</i></b>       | bacillariophyceae |
| <i>Cyclotella</i> sp.                   | bacillariophyceae |
| <b><i>Dinobryon divergens</i></b>       | chrysophyceae     |
| <b><i>Fragilaria acus</i></b>           | bacillariophyceae |
| <i>Fragilaria crotonensis</i>           | bacillariophyceae |
| <i>Fragilaria ulna</i>                  | bacillariophyceae |
| <i>Gymnodinium</i> sp.                  | dinophyceae       |
| <i>Kathablepharis</i> sp.               | cryptophyceae     |
| <i>Mallomonas caudata</i>               | chrysophyceae     |
| <i>Mallomonas</i> sp.                   | chrysophyceae     |
| <b><i>Microcystis aeruginosa</i></b>    | cyanobacteria     |
| <i>Monoraphidium contortum</i>          | chlorophyceae     |
| <i>Monoraphidium komarkovae</i>         | chlorophyceae     |
| <i>Monoraphidium</i> sp.                | chlorophyceae     |
| <i>Navicula</i> sp.                     | bacillariophyceae |
| <i>Oocystis lacustris</i>               | chlorophyceae     |
| <i>Phacus</i> sp.                       | dinophyceae       |
| <i>Planktothrix rubescens</i>           | cyanobacteria     |
| <i>Rhodomonas lacustris</i>             | cryptophyceae     |
| <b><i>Rhodomonas lens</i></b>           | cryptophyceae     |
| <b><i>Rhodomonas minuta</i></b>         | cryptophyceae     |
| <i>Schroederia setigera</i>             | chlorophyceae     |
| <i>Snowella lacustris</i>               | cyanobacteria     |
| <i>Stephanodiscus minutulus</i>         | bacillariophyceae |

**Table S3.** Statistics of the *P. rubescens* cell density ( $10^6$  cell L<sup>-1</sup>) and microcystins concentrations ( $\mu$ g L<sup>-1</sup>) detected in the Finocchito tank monthly campaign (06 Apr 2009–13 Apr 2009) reporting minimum (Italic), median (bold), and maximum (normal) values. P-cd = *P. rubescens* cell density; E-mc = external microcystin concentrations; I-mc: intracellular microcystins concentrations; T-mc = total microcystin concentrations. T-mc is the sum of E-mc, and I-mc.

| P-cd       | E-mc       | I-mc       | T-mc       |
|------------|------------|------------|------------|
| <i>0.1</i> | <i>0.1</i> | <i>0.3</i> | <i>0.4</i> |
| <b>3.3</b> | <b>0.1</b> | <b>1.2</b> | <b>1.3</b> |
| 23         | 0.3        | 9.3        | 9.6        |

**Table S4.** Statistics of the microcystins concentrations ( $\mu\text{g L}^{-1}$ ) detected in the synoptic campaign conducted on the main tanks (10 Jun 2009–23 Nov 2009), reporting minimum (Italic), median (bold), maximum (normal) values. E-mc = external microcystin concentrations; I-mc: internal microcystins concentrations; T-mc = total microcystin concentrations. T-mc is the sum of E-mc, and I-mc.

|                   | <b>E-mc</b> | <b>I-mc</b> | <b>T-mc</b> |
|-------------------|-------------|-------------|-------------|
| <b>Finocchito</b> | <i>0.1</i>  | <i>0.3</i>  | <i>0.5</i>  |
|                   | <b>0.1</b>  | <b>2.3</b>  | <b>2.4</b>  |
|                   | 0.2         | 4.9         | 5.0         |
| <b>Tavoliere</b>  | <i>0.1</i>  | <i>0.3</i>  | <i>0.5</i>  |
|                   | <b>0.2</b>  | <b>1.3</b>  | <b>1.4</b>  |
|                   | 0.2         | 3.2         | 3.4         |
| <b>Tank D</b>     | <i>0.1</i>  | <i>0.3</i>  | <i>0.4</i>  |
|                   | <b>0.1</b>  | <b>1.1</b>  | <b>1.2</b>  |
|                   | 0.2         | 4.5         | 4.7         |
| <b>Tank 5</b>     | <i>0.1</i>  | <i>0.3</i>  | <i>0.4</i>  |
|                   | <b>0.3</b>  | <b>0.4</b>  | <b>0.6</b>  |
|                   | 1.4         | 0.6         | 1.9         |
| <b>Tank P1</b>    | <i>0.1</i>  | <i>0.3</i>  | <i>0.4</i>  |
|                   | <b>0.1</b>  | <b>0.4</b>  | <b>0.5</b>  |
|                   | 0.2         | 3.1         | 3.2         |
| <b>Tank 3</b>     | <i>0.1</i>  | <i>0.3</i>  | <i>0.4</i>  |
|                   | <b>0.2</b>  | <b>0.3</b>  | <b>0.5</b>  |
|                   | 0.7         | 0.3         | 1.0         |
